# Supplementary material for: Antimicrobial Susceptibility of Streptococcus suis Isolated from Diseased Pigs in Thailand, 2018–2020
Source: MDPI journal article supplement (doi:10.3390/antibiotics11030410), 2022-03-18
Supplement: s1 [file s1]

**Table S1.** Sources of *S. suis* strains isolated from diseased pigs during 2018-2020.

| Provinces         | Farms     | Strains   | Sources of specimens, n (%) |          |             |           |            |                  |          |             |              |
|-------------------|-----------|-----------|-----------------------------|----------|-------------|-----------|------------|------------------|----------|-------------|--------------|
|                   |           |           | Blood                       | Brain    | Joint fluid | Lung      | Nasal swab | Pleural effusion | Spleen   | Tongue swab | Vaginal swab |
| n=14              | n=105     | n=246     | n=2                         | n=20     | n=6         | n=201     | n=11       | n=1              | n=2      | n=1         | n=2          |
| Nakhon Pathom     | 33 (31.4) | 84 (34.1) | 1 (50.0)                    | 4 (20.0) | -           | 76 (37.8) | 2 (18.2)   | -                | 1 (50.0) | -           | -            |
| Ratchaburi        | 32 (30.5) | 77 (31.3) | -                           | 7 (35.0) | 4 (66.7)    | 59 (29.4) | 4 (36.4)   | 1 (100.0)        | -        | -           | 2 (100.0)    |
| Chon Buri         | 13 (12.4) | 35 (14.2) | -                           | -        | -           | 31 (15.4) | 3 (27.3)   | -                | 1 (50.0) | -           | -            |
| Chachoengsao      | 6 (5.7)   | 13 (5.3)  | -                           | 2 (10.0) | -           | 10 (5.0)  | -          | -                | -        | 1 (100.0)   | -            |
| Lopburi           | 4 (3.8)   | 17 (6.9)  | -                           | 5 (25.0) | 1 (16.7)    | 9 (4.5)   | 2 (18.2)   | -                | -        | -           | -            |
| Prachin Buri      | 3 (2.9)   | 4 (1.6)   | -                           | -        | -           | 4 (2.0)   | -          | -                | -        | -           | -            |
| Kanchanaburi      | 3 (2.9)   | 3 (1.2)   | -                           | -        | -           | 3 (1.5)   | -          | -                | -        | -           | -            |
| Suphan Buri       | 3 (2.9)   | 3 (1.2)   | -                           | -        | -           | 3 (1.5)   | -          | -                | -        | -           | -            |
| Khon Kaen         | 2 (1.9)   | 4 (1.6)   | -                           | 2 (10.0) | 1 (16.7)    | 1 (0.5)   | -          | -                | -        | -           | -            |
| Nakhon Ratchasima | 2 (1.9)   | 2 (0.8)   | -                           | -        | -           | 2 (1.0)   | -          | -                | -        | -           | -            |
| Nakhon Sawan      | 1 (1.0)   | 1 (0.4)   | -                           | -        | -           | 1 (0.5)   | -          | -                | -        | -           | -            |
| Phuket            | 1 (1.0)   | 1 (0.4)   | -                           | -        | -           | 1 (0.5)   | -          | -                | -        | -           | -            |
| Saraburi          | 1 (1.0)   | 1 (0.4)   | 1 (50.0)                    | -        | -           | -         | -          | -                | -        | -           | -            |
| Ubon Ratchathani  | 1 (1.0)   | 1 (0.4)   | -                           | -        | -           | 1 (0.5)   | -          | -                | -        | -           | -            |

**Table S2.** Distribution of *S. suis* serotypes in different sources of specimens.

| Serotypes    | Strains<br>n=246 | Sources of specimens, n (%) |               |                    |               |                    |                         |               |                    |                     |
|--------------|------------------|-----------------------------|---------------|--------------------|---------------|--------------------|-------------------------|---------------|--------------------|---------------------|
|              |                  | Blood<br>n=2                | Brain<br>n=20 | Joint fluid<br>n=6 | Lung<br>n=201 | Nasal swab<br>n=11 | Pleural effusion<br>n=1 | Spleen<br>n=2 | Tongue swab<br>n=1 | Vaginal swab<br>n=2 |
| 1 or 14      | 6 (2.4)          | -                           | 1 (5.0)       | 1 (16.7)           | 4 (2.0)       | -                  | -                       | -             | -                  | -                   |
| 2 or ½       | 63 (25.6)        | 1 (50.0)                    | 10 (50.0)     | 3 (50.0)           | 47 (23.4)     | 1 (9.1)            | -                       | 1 (50.0)      | -                  | -                   |
| 3            | 12 (4.9)         | -                           | -             | 1 (16.7)           | 11 (5.5)      | -                  | -                       | -             | -                  | -                   |
| 4            | 6 (2.4)          | -                           | 2 (10.0)      | -                  | 4 (2.0)       | -                  | -                       | -             | -                  | -                   |
| 5            | 8 (3.3)          | -                           | -             | -                  | 8 (4.0)       | -                  | -                       | -             | -                  | -                   |
| 6            | 1 (0.4)          | -                           | -             | -                  | 1 (0.5)       | -                  | -                       | -             | -                  | -                   |
| 7            | 5 (2.0)          | -                           | -             | -                  | 5 (2.5)       | -                  | -                       | -             | -                  | -                   |
| 8            | 19 (7.7)         | -                           | -             | -                  | 19 (9.5)      | -                  | -                       | -             | -                  | -                   |
| 9            | 16 (6.5)         | -                           | 6 (30.0)      | -                  | 9 (4.5)       | -                  | 1 (100.0)               | -             | -                  | -                   |
| 10           | 1 (0.4)          | -                           | -             | -                  | 1 (0.5)       | -                  | -                       | -             | -                  | -                   |
| 11           | 1 (0.4)          | -                           | -             | -                  | 1 (0.5)       | -                  | -                       | -             | -                  | -                   |
| 12           | 1 (0.4)          | -                           | -             | -                  | 1 (0.5)       | -                  | -                       | -             | -                  | -                   |
| 15           | 2 (0.8)          | -                           | -             | -                  | 2 (1.0)       | -                  | -                       | -             | -                  | -                   |
| 16           | 9 (3.7)          | -                           | -             | -                  | 6 (3.0)       | 2 (18.2)           | -                       | -             | -                  | 1 (50.0)            |
| 18           | 6 (2.4)          | -                           | 1 (5.0)       | 1 (16.7)           | 4 (2.0)       | -                  | -                       | -             | -                  | -                   |
| 21           | 16 (6.5)         | -                           | -             | -                  | 14 (7.0)      | 2 (18.2)           | -                       | -             | -                  | -                   |
| 23           | 1 (0.4)          | -                           | -             | -                  | 1 (0.5)       | -                  | -                       | -             | -                  | -                   |
| 24           | 2 (0.8)          | -                           | -             | -                  | 2 (1.0)       | -                  | -                       | -             | -                  | -                   |
| 25           | 1 (0.4)          | -                           | -             | -                  | 1 (0.5)       | -                  | -                       | -             | -                  | -                   |
| 27           | 4 (1.6)          | -                           | -             | -                  | 4 (2.0)       | -                  | -                       | -             | -                  | -                   |
| 28           | 4 (1.6)          | -                           | -             | -                  | 2 (1.0)       | 1 (9.1)            | -                       | -             | 1 (100.0)          | -                   |
| 29           | 19 (7.7)         | -                           | -             | -                  | 14 (7.0)      | 5 (45.5)           | -                       | -             | -                  | -                   |
| 30           | 1 (0.4)          | -                           | -             | -                  | 1 (0.5)       | -                  | -                       | -             | -                  | -                   |
| 31           | 8 (3.3)          | -                           | -             | -                  | 7 (3.5)       | -                  | -                       | -             | -                  | 1 (50.0)            |
| Non-typeable | 34 (13.8)        | 1 (50.0)                    | -             | -                  | 32 (15.9)     | -                  | -                       | 1 (50.0)      | -                  | -                   |

**Table S3.** MIC breakpoints and interpretative categories of antimicrobial susceptibility test.

| Antibiotic drugs               |     |                               | Interpretive categories and MIC breakpoints, µg/mL <sup>a</sup> |                  |                | References                    |
|--------------------------------|-----|-------------------------------|-----------------------------------------------------------------|------------------|----------------|-------------------------------|
|                                |     |                               | Susceptibility (S)                                              | Intermediate (I) | Resistance (R) |                               |
| Cell-wall synthesis inhibitors | AMC | Amoxicillin/Clavulanic acid   | ≤ 8/4                                                           | 16/8             | ≥ 32/16        | Hernandez-Garcia et al., 2017 |
|                                | AMP | Ampicillin                    | ≤ 0.5                                                           | 1                | ≥ 2            | CLSI Vet01S, 2020             |
|                                | CPM | Cefepime                      | ≤ 0.5                                                           | -                | ≥ 1            | EUCAST, 2020                  |
|                                | CTX | Cefotaxime                    | ≤ 0.5                                                           | -                | ≥ 1            | EUCAST, 2020                  |
|                                | CEF | Ceftiofur                     | ≤ 2                                                             | 4                | ≥ 8            | CLSI Vet01S, 2020             |
|                                | CRO | Ceftriaxone                   | ≤ 0.5                                                           | -                | ≥ 1            | EUCAST, 2020                  |
|                                | FUR | Cefuroxime                    | ≤ 0.5                                                           | -                | ≥ 1            | EUCAST, 2020                  |
|                                | DAN | Danofloxacin                  | ND                                                              | ND               | ND             | ND                            |
|                                | DAP | Daptomycin                    | ≤ 1                                                             | -                | ≥ 2            | CLSI M100, 2020               |
|                                | ETP | Ertapenem                     | ≤ 0.5                                                           | -                | ≥ 1            | EUCAST, 2020                  |
|                                | MEM | Meropenem                     | ≤ 2                                                             | -                | ≥ 4            | EUCAST, 2020                  |
|                                | PEN | Penicillin                    | ≤ 0.25                                                          | 0.5              | ≥ 1            | CLSI Vet01S, 2020             |
|                                | VAN | Vancomycin                    | ≤ 1                                                             | -                | ≥ 2            | CLSI Vet01S, 2020             |
| Protein synthesis inhibitors   | AZM | Azithromycin                  | ≤ 0.5                                                           | 1                | ≥ 2            | CLSI Vet01S, 2020             |
|                                | CHL | Chloramphenicol               | ≤ 4                                                             | 8                | ≥ 16           | CLSI Vet01S, 2020             |
|                                | CTC | Chlortetracycline             | ≤ 2                                                             | 4                | ≥ 8            | Che et al., 2018              |
|                                | CLI | Clindamycin                   | ≤ 0.5                                                           | 1-2              | ≥ 4            | CLSI Vet01S, 2020             |
|                                | ERY | Erythromycin                  | ≤ 0.25                                                          | 0.5              | ≥ 1            | EUCAST, 2020                  |
|                                | FFC | Florfenicol                   | ≤ 2                                                             | 4                | ≥ 8            | CLSI Vet01S, 2020             |
|                                | GEN | Gentamicin                    | ≤ 4                                                             | 8                | ≥ 16           | Zhang et al., 2020            |
|                                | LNZ | Linezolid                     | ≤ 2                                                             | -                | ≥ 4            | EUCAST 2020                   |
|                                | NEO | Neomycin                      | ≤ 16                                                            | -                | ≥ 32           | Gurung et al., 2015           |
|                                | OXY | Oxytetracycline               | ≤ 4                                                             | -                | ≥ 8            | Gurung et al., 2015           |
|                                | SPE | Spectinomycin                 | ≤ 64                                                            | -                | ≥ 128          | Yu et al, 2018                |
|                                | TET | Tetracyclin                   | ≤ 0.5                                                           | 1                | ≥ 2            | CLSI Vet01S, 2020             |
|                                | TMS | Tiamulin                      | ≤ 16                                                            | -                | ≥ 32           | Yu et al., 2018               |
|                                | TGC | Tigecycline                   | ≤ 0.25                                                          | -                | ≥ 0.5          | FDA, 2019                     |
|                                | TMS | Tilmicosin                    | ≤ 16                                                            | -                | ≥ 32           | Zhang et al., 2015            |
|                                | TUL | Tulathromycin                 | ND                                                              | ND               | ND             | ND                            |
|                                | TYL | Tylosin tartrate              | ≤ 4                                                             | -                | ≥ 8            | Gurung et al, 2015            |
| DNA synthesis inhibitors       | ENO | Enrofloxacin                  | ≤ 0.5                                                           | 1                | ≥ 2            | CLSI Vet01S, 2020             |
|                                | LEV | Levofloxacin                  | ≤ 0.01                                                          | 0.03-2           | ≥ 4            | EUCAST, 2020                  |
|                                | MXF | Moxifloxacin                  | ≤ 0.5                                                           | -                | ≥ 1            | EUCAST, 2020                  |
| Antimetabolites                | SDM | Sulphadimethoxine             | ND                                                              | ND               | ND             | ND                            |
|                                | SXT | Trimethoprim/sulfamethoxazole | ≤ 0.5/9.5                                                       | 1/19-2/38        | ≥ 4/76         | CLSI Vet01S, 2020             |

<sup>a</sup> MIC, minimum inhibitory concentration values, are interpreted as susceptible (S), intermediate (I), and resistant (R) using CLSI veterinary breakpoints (Vet01S, 2020), EUCAST (EUCAST, 2020), FDA (FDA, 2019), or previously reported data when available. ND, no data/not determined.

**Table S4.** Minimum inhibitory concentration (MIC) values distribution, MIC<sub>50</sub> and MIC<sub>90</sub> values, and resistance rates of 72 *S. suis* strains in 2018.

| Antibiotic drugs              | MIC breakpoints (µg/mL) |             |         | MIC values (µg/mL) <sup>a</sup> |       |      |      |       |      |     |    |    |    |    |    |    |    |     |     |     | MIC <sub>50</sub> | MIC <sub>90</sub> | S (%) | I (%) | R (%) | MIC ranges    |
|-------------------------------|-------------------------|-------------|---------|---------------------------------|-------|------|------|-------|------|-----|----|----|----|----|----|----|----|-----|-----|-----|-------------------|-------------------|-------|-------|-------|---------------|
|                               | S                       | I           | R       | 0.008                           | 0.016 | 0.03 | 0.06 | 0.125 | 0.25 | 0.5 | 1  | 2  | 4  | 8  | 16 | 32 | 64 | 128 | 256 | 512 |                   |                   |       |       |       |               |
| Amoxicillin/Clavulanic acid   | ≤ 8/4                   | 16/8        | ≥ 32/16 |                                 |       |      |      |       |      |     |    | 60 | 2  | 5  | 1  | 4  |    |     |     |     | ≤ 2               | 8                 | 93.1  | 1.4   | 5.6   | ≤ 2 - > 16    |
| Ampicillin                    | ≤ 0.5                   | 1           | ≥ 2     |                                 |       |      |      |       | 54   | 2   | 1  | 2  | 2  | 2  | 4  | 5  |    |     |     |     | ≤ 0.25            | 16                | 77.8  | 1.4   | 20.8  | ≤ 0.25 - > 16 |
| Cefepime                      | ≤ 2                     | 4           | ≥ 8     |                                 |       |      |      |       |      | 53  | 7  | 4  | 4  | 2  | 2  |    |    |     |     |     | ≤ 0.5             | 4                 | 73.6  | ND    | 26.4  | ≤ 0.5 - > 8   |
| Cefotaxime                    | ≤ 0.5                   | -           | ≥ 1     |                                 |       |      |      | 9     | 5    | 14  | 24 | 6  | 5  | 9  |    |    |    |     |     |     | 1                 | > 4               | 38.9  | ND    | 61.1  | ≤ 0.12 - > 4  |
| Ceftiofur                     | ≤ 0.5                   | -           | ≥ 1     |                                 |       |      |      |       | 47   | 9   | 4  | 5  |    | 3  | 4  |    |    |     |     |     | ≤ 0.25            | 2                 | 90.3  | 0.0   | 9.7   | ≤ 0.25 - > 8  |
| Ceftriaxone                   | ≤ 0.5                   | -           | ≥ 1     |                                 |       |      |      | 9     | 5    | 12  | 28 | 5  | 13 |    |    |    |    |     |     |     | 1                 | > 2               | 36.1  | ND    | 63.9  | ≤ 0.12 - > 2  |
| Cefuroxime                    | ≤ 0.5                   | -           | ≥ 1     |                                 |       |      |      |       |      | 23  | 23 | 10 | 6  | 10 |    |    |    |     |     |     | 1                 | > 4               | 31.9  | ND    | 68.1  | ≤ 0.5 - > 4   |
| Daptomycin                    | ≤ 1                     | -           | ≥ 2     |                                 |       |      |      | 3     | 23   | 38  | 3  | 2  | 1  | 2  |    |    |    |     |     |     | 0.25              | 0.5               | 95.8  | ND    | 4.2   | ≤ 0.06 - > 2  |
| Ertapenem                     | ≤ 0.5                   | -           | ≥ 1     |                                 |       |      |      |       |      |     | 70 | 2  |    |    |    |    |    |     |     |     | ≤ 0.5             | ≤ 0.5             | 97.2  | ND    | 2.8   | ≤ 0.5 - 1     |
| Meropenem                     | ≤ 2                     | -           | ≥ 4     |                                 |       |      |      |       |      |     | 70 | 2  |    |    |    |    |    |     |     |     | ≤ 0.25            | ≤ 0.25            | 100.0 | ND    | 0.0   | ≤ 0.25 - 0.5  |
| Penicillin                    | ≤ 0.25                  | 0.5         | ≥ 1     |                                 | 6     | 1    | 10   |       | 11   | 10  | 8  | 4  | 7  | 4  | 11 |    |    |     |     |     | 0.5               | > 8               | 38.9  | 13.9  | 47.2  | ≤ 0.03 - > 8  |
| Vancomycin                    | ≤ 1                     | -           | ≥ 2     |                                 |       |      |      |       |      |     | 70 | 1  |    |    | 1  |    |    |     |     |     | ≤ 0.5             | ≤ 0.5             | 98.6  | ND    | 1.4   | ≤ 0.5 - > 4   |
| Azithromycin                  | ≤ 0.5                   | 1           | ≥ 2     |                                 |       |      |      |       | 2    |     |    |    |    | 70 |    |    |    |     |     |     | > 2               | > 2               | 2.8   | 0.0   | 97.2  | ≤ 0.25 - > 2  |
| Chloramphenicol               | ≤ 4                     | 8           | ≥ 16    |                                 |       |      |      |       |      |     |    |    | 16 | 28 | 11 | 10 | 7  |     |     |     | 8                 | 32                | 22.2  | 38.9  | 38.9  | 4 - > 32      |
| Chlortetracycline             | ≤ 2                     | 4           | ≥ 8     |                                 |       |      |      |       |      | 1   | 1  |    | 2  | 8  | 60 |    |    |     |     |     | > 8               | > 8               | 2.8   | 2.8   | 94.4  | ≤ 0.5 - > 8   |
| Clindamycin                   | ≤ 0.5                   | 1-2         | ≥ 4     |                                 |       |      |      |       | 1    |     |    |    |    |    |    | 1  | 70 |     |     |     | > 16              | > 16              | 1.4   | 0.0   | 98.6  | 0.25 - > 16   |
| Erythromycin                  | ≤ 0.25                  | 0.5         | ≥ 1     |                                 |       |      |      |       | 2    |     |    | 2  |    | 68 |    |    |    |     |     |     | > 2               | > 2               | 2.8   | 0.0   | 97.2  | ≤ 0.25 - > 2  |
| Florfenicol                   | ≤ 2                     | 4           | ≥ 8     |                                 |       |      |      |       |      |     | 2  | 18 | 20 | 6  | 26 |    |    |     |     |     | 4                 | > 8               | 27.8  | 27.8  | 44.4  | 1 - > 8       |
| Gentamicin                    | ≤ 4                     | 8           | ≥ 16    |                                 |       |      |      |       |      |     | 8  | 13 | 14 | 3  | 1  | 33 |    |     |     |     | 8                 | > 16              | 48.6  | 4.2   | 47.2  | ≤ 1 - > 16    |
| Linezolid                     | ≤ 2                     | -           | ≥ 4     |                                 |       |      |      |       |      | 7   | 35 | 13 | 15 | 2  |    |    |    |     |     |     | 1                 | 4                 | 76.4  | ND    | 23.6  | 0.5 - > 4     |
| Neomycin                      | ≤ 16                    | -           | ≥ 32    |                                 |       |      |      |       |      |     |    |    | 6  | 22 | 10 | 17 | 17 |     |     |     | 16                | > 32              | 52.8  | ND    | 47.2  | ≤ 4 - > 32    |
| Oxytetracycline               | ≤ 4                     | -           | ≥ 8     |                                 |       |      |      |       |      | 1   | 1  |    |    | 3  | 67 |    |    |     |     |     | > 8               | > 8               | 2.8   | ND    | 97.2  | 0.5 - > 8     |
| Spectinomycin                 | ≤ 64                    | -           | ≥ 128   |                                 |       |      |      |       |      |     |    |    |    | 4  | 15 | 17 | 1  | 35  |     |     | 32                | > 64              | 51.4  | ND    | 48.6  | ≤ 8 - > 64    |
| Tetracycline                  | ≤ 0.5                   | 1           | ≥ 2     |                                 |       |      |      |       |      |     |    | 1  |    | 1  | 70 |    |    |     |     |     | > 8               | > 8               | 0.0   | 0.0   | 100.0 | 2 - > 8       |
| Tiamulin                      | ≤ 16                    | -           | ≥ 32    |                                 |       |      |      |       |      | 2   | 2  | 8  | 1  | 3  | 3  | 2  | 51 |     |     |     | > 32              | > 32              | 26.4  | ND    | 73.6  | ≤ 0.5 - > 32  |
| Tigecycline                   | ≤ 0.25                  | -           | ≥ 0.5   |                                 | 1     | 26   | 25   | 20    |      |     |    |    |    |    |    |    |    |     |     |     | 0.12              | > 0.12            | ND    | ND    | ND    | 0.03 - > 0.12 |
| Tilmicosin                    | ≤ 16                    | -           | ≥ 32    |                                 |       |      |      |       |      |     |    |    | 1  | 1  |    |    |    |     |     |     | > 64              | > 64              | 2.8   | ND    | 97.2  | ≤ 4 - > 32    |
| Tulathromycin                 | ND                      | ND          | ND      |                                 |       |      |      |       |      |     | 1  |    | 1  |    | 1  | 1  | 1  | 67  |     |     | > 64              | > 64              | ND    | ND    | ND    | ≤ 1 - > 64    |
| Tylosin tartrate              | ≤ 4                     | -           | ≥ 8     |                                 |       |      |      |       |      |     | 2  |    |    |    |    |    |    |     |     |     | > 32              | > 32              | 2.8   | ND    | 97.2  | 1 - > 64      |
| Danofloxacin                  | ND                      | ND          | ND      |                                 |       |      |      | 2     | 2    | 9   | 21 | 38 |    |    |    |    |    |     |     |     | > 1               | > 1               | ND    | ND    | ND    | ≤ 0.12 - > 2  |
| Enrofloxacin                  | ≤ 0.5                   | 1           | ≥ 2     |                                 |       |      |      |       | 6    | 17  | 7  | 11 | 31 |    | 28 |    |    |     |     |     | 2                 | > 2               | 31.9  | 9.7   | 58.3  | 0.25 - > 2    |
| Levofloxacin                  | ≤ 0.01                  | 0.03 - 2    | ≥ 4     |                                 |       |      |      |       |      | 24  | 12 | 3  | 5  |    |    |    |    |     |     |     | 1                 | > 4               | ND    | 54.2  | 45.8  | ≤ 0.5 - > 4   |
| Moxifloxacin                  | ≤ 0.5                   | -           | ≥ 1     |                                 |       |      |      |       |      |     | 61 | 10 | 1  |    |    |    |    |     |     |     | ≤ 1               | 2                 | ND    | ND    | ND    | ≤ 1 - 4       |
| Sulphadimethoxine             | ND                      | ND          | ND      |                                 |       |      |      |       |      |     |    |    |    |    |    |    |    |     | 5   | 67  | > 256             | > 256             | ND    | ND    | ND    | ≤ 256 - > 256 |
| Trimethoprim/sulfamethoxazole | ≤ 0.5/9.5               | 1/19 - 2/38 | ≥ 4/76  |                                 |       |      |      |       |      | 26  | 2  | 1  | 5  | 38 |    |    |    |     |     |     | > 2               | > 4               | 36.1  | 4.2   | 59.7  | ≤ 0.5 - > 4   |

<sup>a</sup> White cells indicate the dilution range tested. Green and red vertical lines respectively describe the susceptible and resistant clinical breakpoints recommended by the CLSI (Vet01S, 2020), EUCAST (EUCAST, 2020), FDA (FDA, 2019), and previously reported data. MIC, minimum inhibitory concentration values, which are interpreted as susceptible (S), intermediate (I), and resistant (R). MIC<sub>50</sub>, the MIC which inhibits 50% of the isolates tested; MIC<sub>90</sub>, the MIC which inhibits 90% of the isolates tested; ND, no data/not determined.

**Table S5.** Minimum inhibitory concentration (MIC) values distribution, MIC<sub>50</sub> and MIC<sub>90</sub> values, and resistance rates of 97 *S. suis* strains in 2019.

| Antibiotic drugs              | MIC breakpoints (µg/mL) |             |         | MIC values (µg/mL) * |       |      |      |       |      |     |    |    |    |    |    |    |    |     |     | MIC <sub>50</sub> | MIC <sub>90</sub> | S (%)  | I (%) | R (%) | MIC ranges |               |
|-------------------------------|-------------------------|-------------|---------|----------------------|-------|------|------|-------|------|-----|----|----|----|----|----|----|----|-----|-----|-------------------|-------------------|--------|-------|-------|------------|---------------|
|                               | S                       | I           | R       | 0.008                | 0.016 | 0.03 | 0.06 | 0.125 | 0.25 | 0.5 | 1  | 2  | 4  | 8  | 16 | 32 | 64 | 128 | 256 |                   |                   |        |       |       |            | 512           |
| Amoxicillin/Clavulanic acid   | ≤ 8/4                   | 16/8        | ≥ 32/16 |                      |       |      |      |       |      |     |    | 79 | 4  | 11 | 3  |    |    |     |     |                   | ≤ 2               | 8      | 96.9  | 3.1   | 0.0        | ≤ 2 - 16      |
| Ampicillin                    | ≤ 0.5                   | 1           | ≥ 2     |                      |       |      |      |       | 56   | 5   | 1  | 8  | 6  | 4  | 4  | 13 |    |     |     |                   | ≤ 0.25            | > 16   | 62.9  | 1.0   | 36.1       | ≤ 0.25 - > 16 |
| Cefepime                      | ≤ 2                     | 4           | ≥ 8     |                      |       |      |      |       |      | 69  | 10 | 5  | 9  | 3  | 1  |    |    |     |     |                   | ≤ 0.5             | 4      | 71.1  | ND    | 28.9       | ≤ 0.5 - > 8   |
| Cefotaxime                    | ≤ 0.5                   | -           | ≥ 1     |                      |       |      |      | 12    | 10   | 19  | 26 | 9  | 6  | 15 |    |    |    |     |     |                   | 1                 | > 4    | 42.3  | ND    | 57.7       | ≤ 0.12 - > 4  |
| Ceftiofur                     | ≤ 0.5                   | -           | ≥ 1     |                      |       |      |      |       | 55   | 11  | 13 | 4  | 3  | 4  | 7  |    |    |     |     |                   | ≤ 0.25            | 8      | 85.6  | 3.1   | 11.3       | ≤ 0.25 - > 8  |
| Ceftriaxone                   | ≤ 0.5                   | -           | ≥ 1     |                      |       |      |      | 13    | 7    | 20  | 23 | 11 | 23 |    |    |    |    |     |     |                   | 1                 | > 2    | 41.2  | ND    | 58.8       | ≤ 0.12 - > 2  |
| Cefuroxime                    | ≤ 0.5                   | -           | ≥ 1     |                      |       |      |      |       |      | 37  | 31 | 13 |    | 16 |    |    |    |     |     |                   | 1                 | > 4    | 38.1  | ND    | 61.9       | ≤ 0.5 - > 4   |
| Daptomycin                    | ≤ 1                     | -           | ≥ 2     |                      |       |      |      | 12    | 41   | 37  | 3  | 2  |    | 2  |    |    |    |     |     |                   | 0.12              | 0      | 97.9  | ND    | 2.1        | ≤ 0.06 - > 2  |
| Ertapenem                     | ≤ 0.5                   | -           | ≥ 1     |                      |       |      |      |       |      | 95  |    | 2  |    |    |    |    |    |     |     |                   | ≤ 0.5             | ≤ 0.5  | 97.9  | ND    | 2.1        | ≤ 0.5 - 2     |
| Meropenem                     | ≤ 2                     | -           | ≥ 4     |                      |       |      |      |       | 96   | 1   |    |    |    |    |    |    |    |     |     |                   | ≤ 0.25            | ≤ 0.25 | 100.0 | ND    | 0.0        | ≤ 0.25 - 0.5  |
| Penicillin                    | ≤ 0.25                  | 0.5         | ≥ 1     |                      | 5     | 9    | 2    | 8     | 23   | 9   | 4  | 8  | 7  | 22 |    |    |    |     |     |                   | 1                 | > 8    | 24.7  | 23.7  | 51.5       | ≤ 0.03 - > 8  |
| Vancomycin                    | ≤ 1                     | -           | ≥ 2     |                      |       |      |      |       | 93   |     | 2  | 1  | 1  |    |    |    |    |     |     |                   | ≤ 0.5             | ≤ 0.5  | 95.9  | ND    | 4.1        | ≤ 0.5 - > 4   |
| Azithromycin                  | ≤ 0.5                   | 1           | ≥ 2     |                      |       |      |      | 2     | 1    | 1   | 1  |    | 92 |    |    |    |    |     |     |                   | > 2               | > 2    | 3.1   | 1.0   | 95.9       | ≤ 0.25 - > 2  |
| Chloramphenicol               | ≤ 4                     | 8           | ≥ 16    |                      |       |      |      |       |      |     | 4  | 30 | 21 | 16 | 15 | 11 |    |     |     |                   | 8                 | > 32   | 35.1  | 21.6  | 43.3       | 2 - > 32      |
| Chlortetracycline             | ≤ 2                     | 4           | ≥ 8     |                      |       |      |      |       |      | 2   | 1  |    | 1  | 4  | 89 |    |    |     |     |                   | > 8               | > 8    | 3.1   | 1.0   | 95.9       | ≤ 0.5 - > 8   |
| Clindamycin                   | ≤ 0.5                   | 1-2         | ≥ 4     |                      |       |      |      |       |      |     |    |    | 1  | 2  | 1  | 93 |    |     |     |                   | > 16              | > 16   | 0.0   | 0.0   | 100.0      | 4 - > 16      |
| Erythromycin                  | ≤ 0.25                  | 0.5         | ≥ 1     |                      |       |      |      | 2     | 1    | 1   | 1  |    | 92 |    |    |    |    |     |     |                   | > 2               | > 2    | 2.1   | 1.0   | 96.9       | ≤ 0.25 - > 2  |
| Florfenicol                   | ≤ 2                     | 4           | ≥ 8     |                      |       |      |      |       |      | 2   | 27 | 18 | 3  | 47 |    |    |    |     |     |                   | 8                 | > 8    | 29.9  | 18.6  | 51.5       | 1 - > 8       |
| Gentamicin                    | ≤ 4                     | 8           | ≥ 16    |                      |       |      |      |       |      |     | 11 | 15 | 12 | 7  | 10 | 42 |    |     |     |                   | 16                | > 16   | 39.2  | 7.2   | 53.6       | ≤ 1 - > 16    |
| Linezolid                     | ≤ 2                     | -           | ≥ 4     |                      |       |      |      | 2     | 13   | 31  | 26 | 20 | 5  |    |    |    |    |     |     |                   | 2                 | 4      | 74.2  | ND    | 25.8       | ≤ 0.25 - > 4  |
| Neomycin                      | ≤ 16                    | -           | ≥ 32    |                      |       |      |      |       |      |     |    | 10 | 35 | 18 | 9  | 25 |    |     |     |                   | 16                | > 32   | 64.9  | ND    | 35.1       | ≤ 4 - > 32    |
| Oxytetracycline               | ≤ 4                     | -           | ≥ 8     |                      |       |      |      |       | 1    | 1   | 3  |    | 1  | 91 |    |    |    |     |     |                   | > 8               | > 8    | 5.2   | ND    | 94.8       | ≤ 0.5 - > 8   |
| Spectinomycin                 | ≤ 64                    | -           | ≥ 128   |                      |       |      |      |       |      |     |    |    |    | 10 | 17 | 15 | 3  | 52  |     |                   | > 64              | > 64   | 46.4  | ND    | 53.6       | ≤ 8 - > 64    |
| Tetracycline                  | ≤ 0.5                   | 1           | ≥ 2     |                      |       |      |      |       |      | 2   |    |    |    | 95 |    |    |    |     |     |                   | > 8               | > 8    | 0.0   | 2.1   | 97.9       | ≤ 1 - > 8     |
| Tiamulin                      | ≤ 16                    | -           | ≥ 32    |                      |       |      |      |       | 4    | 3   | 3  |    | 2  | 6  | 3  | 76 |    |     |     |                   | > 32              | > 32   | 18.6  | ND    | 81.4       | ≤ 0.5 - > 32  |
| Tigecycline                   | ≤ 0.25                  | -           | ≥ 0.5   |                      | 4     | 11   | 14   | 68    |      |     |    |    |    |    |    |    |    |     |     |                   | > 0.12            | > 0.12 | ND    | ND    | ND         | 0.03 - > 0.12 |
| Tilmicosin                    | ≤ 16                    | -           | ≥ 32    |                      |       |      |      |       |      |     |    |    |    | 1  |    |    | 96 |     |     |                   | > 64              | > 64   | 1.0   | ND    | 99.0       | 8 - > 64      |
| Tulathromycin                 | ND                      | ND          | ND      |                      |       |      |      |       |      |     | 1  | 1  |    | 1  | 1  | 2  | 91 |     |     |                   | > 64              | > 64   | ND    | ND    | ND         | 2 - > 64      |
| Tylosin tartrate              | ≤ 4                     | -           | ≥ 8     |                      |       |      |      |       |      | 2   |    |    |    |    |    |    |    |     |     |                   | > 32              | > 32   | 2.1   | ND    | 97.9       | 1 - > 32      |
| Danofloxacin                  | ND                      | ND          | ND      |                      |       |      |      | 5     | 22   | 20  | 50 |    |    |    |    |    |    |     |     |                   | > 1               | > 1    | ND    | ND    | ND         | 0.25 - > 1    |
| Enrofloxacin                  | ≤ 0.5                   | 1           | ≥ 2     |                      |       |      |      | 8     | 30   | 9   |    | 50 |    |    |    |    |    |     |     |                   | > 2               | > 2    | 39.2  | 9.3   | 51.5       | 0.25 - > 2    |
| Levofloxacin                  | ≤ 0.01                  | 0.03 - 2    | ≥ 4     |                      |       |      |      |       | 39   | 6   | 2  | 5  | 45 |    |    |    |    |     |     |                   | 4                 | > 4    | 0.0   | 48.5  | 51.5       | ≤ 0.5 - > 4   |
| Moxifloxacin                  | ≤ 0.5                   | -           | ≥ 1     |                      |       |      |      |       |      |     | 82 | 10 | 4  | 1  |    |    |    |     |     |                   | ≤ 1               | 2      | ND    | ND    | ND         | ≤ 1 - 8       |
| Sulphadimethoxine             | ND                      | ND          | ND      |                      |       |      |      |       |      |     |    |    |    |    |    |    |    |     | 5   | 92                | > 256             | > 256  | ND    | ND    | ND         | ≤ 256 - > 256 |
| Trimethoprim/sulfamethoxazole | ≤ 0.5/9.5               | 1/19 - 2/38 | ≥ 4/76  |                      |       |      |      |       |      | 35  | 1  | 2  | 10 | 49 |    |    |    |     |     |                   | > 2               | > 4    | 36.1  | 3.1   | 60.8       | ≤ 0.5 - > 4   |

<sup>a</sup> White cells indicate the dilution range tested. Green and red vertical lines respectively describe the susceptible and resistant clinical breakpoints recommended by the CLSI (Vet01S, 2020), EUCAST (EUCAST, 2020), FDA (FDA, 2019), and previously reported data. MIC, minimum inhibitory concentration values, which are interpreted as susceptible (S), intermediate (I), and resistant (R). MIC<sub>50</sub>, the MIC which inhibits 50% of the isolates tested; MIC<sub>90</sub>, the MIC which inhibits 90% of the isolates tested; ND, no data/not determined.

**Table S6.** Minimum inhibitory concentration (MIC) values distribution, MIC<sub>50</sub> and MIC<sub>90</sub> values, and resistance rates of 77 *S. suis* strains in 2020.

| Antibiotic drugs              | MIC breakpoints (µg/mL) |             |         | MIC values (µg/mL) <sup>a</sup> |       |      |      |       |      |     |    |    |    |    |    |    |    |     |     |     | MIC <sub>50</sub> | MIC <sub>90</sub> | S (%) | I (%) | R (%) | MIC ranges       |
|-------------------------------|-------------------------|-------------|---------|---------------------------------|-------|------|------|-------|------|-----|----|----|----|----|----|----|----|-----|-----|-----|-------------------|-------------------|-------|-------|-------|------------------|
|                               | S                       | I           | R       | 0.008                           | 0.016 | 0.03 | 0.06 | 0.125 | 0.25 | 0.5 | 1  | 2  | 4  | 8  | 16 | 32 | 64 | 128 | 256 | 512 |                   |                   |       |       |       |                  |
| Amoxicillin/Clavulanic acid   | ≤ 8/4                   | 16/8        | ≥ 32/16 |                                 |       |      |      |       |      |     |    | 55 | 7  | 11 | 4  |    |    |     |     |     | ≤ 2               | 8                 | 94.8  | 5.2   | 0.0   | ≤ 2 - 16         |
| Ampicillin                    | ≤ 0.5                   | 1           | ≥ 2     |                                 |       |      |      |       | 40   | 4   | 4  | 5  | 5  | 1  | 5  | 13 |    |     |     |     | ≤ 0.25            | > 16              | 57.1  | 5.2   | 37.7  | ≤ 0.25 - > 16    |
| Cefepime                      | ≤ 2                     | 4           | ≥ 8     |                                 |       |      |      |       |      | 46  | 9  | 9  | 5  | 5  | 3  |    |    |     |     |     | ≤ 0.5             | 4                 | 59.7  | ND    | 40.3  | ≤ 0.5 - > 8      |
| Cefotaxime                    | ≤ 0.5                   | -           | ≥ 1     |                                 |       |      |      | 6     | 5    | 19  | 14 | 13 | 1  | 19 |    |    |    |     |     |     | 1                 | > 4               | 39.0  | ND    | 61.0  | ≤ 0.12 - > 4     |
| Ceftiofur                     | ≤ 0.5                   | -           | ≥ 1     |                                 |       |      |      |       | 40   | 4   | 12 | 6  | 2  | 8  | 5  |    |    |     |     |     | ≤ 0.25            | 8                 | 80.5  | 2.6   | 16.9  | ≤ 0.25 - > 8     |
| Ceftriaxone                   | ≤ 0.5                   | -           | ≥ 1     |                                 |       |      |      | 8     | 4    | 14  | 17 | 6  | 28 |    |    |    |    |     |     |     | 1                 | > 2               | 33.8  | ND    | 66.2  | ≤ 0.12 - > 2     |
| Cefuroxime                    | ≤ 0.5                   | -           | ≥ 1     |                                 |       |      |      |       |      | 19  | 22 | 15 | 1  | 20 |    |    |    |     |     |     | 1                 | > 4               | 24.7  | ND    | 75.3  | ≤ 0.5 - > 4      |
| Daptomycin                    | ≤ 1                     | -           | ≥ 2     |                                 |       |      | 7    | 34    | 32   |     | 2  |    | 2  |    |    |    |    |     |     |     | 0.12              | 0.25              | 97.4  | ND    | 2.6   | ≤ 0.06 - > 2     |
| Ertapenem                     | ≤ 0.5                   | -           | ≥ 1     |                                 |       |      |      |       |      | 75  | 1  |    | 1  |    |    |    |    |     |     |     | ≤ 0.5             | ≤ 0.5             | 97.4  | ND    | 2.6   | ≤ 0.5 - 4        |
| Meropenem                     | ≤ 2                     | -           | ≥ 4     |                                 |       |      |      |       | 75   | 1   | 1  |    |    |    |    |    |    |     |     |     | ≤ 0.25            | ≤ 0.25            | 100.0 | ND    | 0.0   | ≤ 0.25 - 1       |
| Penicillin                    | ≤ 0.25                  | 0.5         | ≥ 1     | 4                               | 8     | 9    |      |       | 8    | 2   | 8  | 12 | 5  | 21 |    |    |    |     |     |     | 2                 | > 8               | 27.3  | 10.4  | 62.3  | ≤ 0.03 - > 8     |
| Vancomycin                    | ≤ 1                     | -           | ≥ 2     |                                 |       |      |      |       |      | 74  | 1  | 1  |    | 1  |    |    |    |     |     |     | ≤ 0.5             | ≤ 0.5             | 97.4  | ND    | 2.6   | ≤ 0.5 - > 4      |
| Azithromycin                  | ≤ 0.5                   | 1           | ≥ 2     |                                 |       |      |      | 3     |      |     |    | 1  | 73 |    |    |    |    |     |     |     | > 2               | > 2               | 3.9   | 0.0   | 96.1  | ≤ 0.25 - > 2     |
| Chloramphenicol               | ≤ 4                     | 8           | ≥ 16    |                                 |       |      |      |       |      |     | 1  | 18 | 23 | 14 | 13 | 8  |    |     |     |     | 8                 | 32                | 24.7  | 29.9  | 45.5  | 2 - > 32         |
| Chlortetracycline             | ≤ 2                     | 4           | ≥ 8     |                                 |       |      |      |       | 1    | 1   |    |    |    | 5  | 70 |    |    |     |     |     | > 8               | > 8               | 2.6   | 0.0   | 97.4  | ≤ 0.5 - > 8      |
| Clindamycin                   | ≤ 0.5                   | 1-2         | ≥ 4     |                                 |       |      |      |       |      |     |    |    | 1  |    | 1  | 75 |    |     |     |     | > 16              | > 16              | 0.0   | 0.0   | 100.0 | 4 - > 16         |
| Erythromycin                  | ≤ 0.25                  | 0.5         | ≥ 1     |                                 |       |      |      | 2     |      | 2   | 3  |    | 70 |    |    |    |    |     |     |     | > 2               | > 2               | 2.6   | 0.0   | 97.4  | ≤ 0.25 - > 2     |
| Florfenicol                   | ≤ 2                     | 4           | ≥ 8     |                                 |       |      |      |       |      | 2   | 13 | 20 | 5  | 37 |    |    |    |     |     |     | 8                 | > 8               | 19.5  | 26.0  | 54.5  | 1 - > 8          |
| Gentamicin                    | ≤ 4                     | 8           | ≥ 16    |                                 |       |      |      |       |      | 5   | 7  | 21 | 6  | 38 |    |    |    |     |     |     | 8                 | > 16              | 42.9  | 7.8   | 49.4  | ≤ 1 - > 16       |
| Linezolid                     | ≤ 2                     | -           | ≥ 4     |                                 |       |      |      |       | 5    | 32  | 17 | 17 | 6  |    |    |    |    |     |     |     | 2                 | 4                 | 70.1  | ND    | 29.9  | 0.5 - > 4        |
| Neomycin                      | ≤ 16                    | -           | ≥ 32    |                                 |       |      |      |       |      |     |    |    | 10 | 13 | 23 | 7  | 24 |     |     |     | 16                | > 32              | 59.7  | ND    | 40.3  | ≤ 4 - > 32       |
| Oxytetracycline               | ≤ 4                     | -           | ≥ 8     |                                 |       |      |      |       | 1    |     | 1  |    | 2  | 73 |    |    |    |     |     |     | > 8               | > 8               | 2.6   | ND    | 97.4  | ≤ 0.5 - > 8      |
| Spectinomycin                 | ≤ 64                    | -           | ≥ 128   |                                 |       |      |      |       |      |     |    |    | 3  | 14 | 8  | 3  | 49 |     |     |     | > 64              | > 64              | 36.4  | ND    | 63.6  | ≤ 8 - > 64       |
| Tetracycline                  | ≤ 0.5                   | 1           | ≥ 2     |                                 |       |      |      |       |      |     | 2  |    | 1  | 74 |    |    |    |     |     |     | > 8               | > 8               | 0.0   | 0.0   | 100.0 | 2 - > 8          |
| Tiamulin                      | ≤ 16                    | -           | ≥ 32    |                                 |       |      |      |       | 3    | 3   | 1  | 1  | 2  | 4  | 2  | 61 |    |     |     |     | > 32              | > 32              | 18.2  | ND    | 81.8  | ≤ 0.5 - > 32     |
| Tigecycline                   | ≤ 0.25                  | -           | ≥ 0.5   | 2                               | 14    | 16   | 29   | 16    |      |     |    |    |    |    |    |    |    |     |     |     | 0.12              | > 0.12            | ND    | ND    | ND    | ≤ 0.015 - > 0.12 |
| Tilmicosin                    | ≤ 16                    | -           | ≥ 32    |                                 |       |      |      |       |      |     |    |    | 2  |    | 1  | 74 |    |     |     |     | > 64              | > 64              | 2.6   | ND    | 97.4  | ≤ 4 - > 64       |
| Tulathromycin                 | ND                      | ND          | ND      |                                 |       |      |      |       |      |     |    | 2  |    |    |    |    |    |     |     |     | > 64              | > 64              | ND    | ND    | ND    | 2 - > 64         |
| Tylosin tartrate              | ≤ 4                     | -           | ≥ 8     |                                 |       |      |      |       |      |     |    | 1  |    |    | 1  | 75 |    |     |     |     | > 32              | > 32              | 1.3   | ND    | 98.7  | 2 - > 32         |
| Danofloxacin                  | ND                      | ND          | ND      |                                 |       |      |      | 1     | 20   | 12  | 44 |    |    |    |    |    |    |     |     |     | > 1               | > 1               | ND    | ND    | ND    | 0.25 - > 1       |
| Enrofloxacin                  | ≤ 0.5                   | 1           | ≥ 2     |                                 |       |      |      | 1     | 6    | 23  | 4  | 1  | 42 |    |    |    |    |     |     |     | > 2               | > 2               | 39.0  | 5.2   | 55.8  | ≤ 0.12 - > 2     |
| Levofloxacin                  | ≤ 0.01                  | 0.03 - 2    | ≥ 4     |                                 |       |      |      |       |      | 20  | 14 | 3  | 2  | 38 |    |    |    |     |     |     | 4                 | > 4               | ND    | 48.1  | 51.9  | ≤ 0.5 - > 4      |
| Moxifloxacin                  | ≤ 0.5                   | -           | ≥ 1     |                                 |       |      |      |       |      |     | 63 | 7  | 7  |    |    |    |    |     |     |     | ≤ 1               | 2                 | ND    | ND    | ND    | ≤ 1 - 4          |
| Sulphadimethoxine             | ND                      | ND          | ND      |                                 |       |      |      |       |      |     |    |    |    |    |    |    |    |     |     |     | > 256             | > 256             | ND    | ND    | ND    | ≤ 25 - 6 - > 256 |
| Trimethoprim/sulfamethoxazole | ≤ 0.5/9.5               | 1/19 - 2/38 | ≥ 4/76  |                                 |       |      |      |       |      | 19  | 2  |    | 11 | 45 |    |    |    |     | 3   | 74  | > 4               | > 4               | 24.7  | 2.6   | 72.7  | ≤ 0.5 - > 4      |

<sup>a</sup> White cells indicate the dilution range tested. Green and red vertical lines respectively describe the susceptible and resistant clinical breakpoints recommended by the CLSI (Vet01S, 2020), EUCAST (EUCAST, 2020), FDA (FDA, 2019), and previously reported data. MIC, minimum inhibitory concentration values, which are interpreted as susceptible (S), intermediate (I), and resistant (R). MIC<sub>50</sub>, the MIC which inhibits 50% of the isolates tested; MIC<sub>90</sub>, the MIC which inhibits 90% of the isolates tested; ND, no data/not determined.

**Table S7.** Oligonucleotide primer sequences (Kerdsin et al., 2014).

| Multiplex PCR reaction set | Target genes or serotypes | Nucleotide sequences (5'-3')                                  | Amplicon size (bp) |
|----------------------------|---------------------------|---------------------------------------------------------------|--------------------|
| All                        | <i>gdh</i>                | F: TTCTGCAGCGTATTCTGTCAAACG<br>R: TGTTCATGGACAGATAAAGATGG     | 695                |
| 1                          | 1 or 14                   | F: AATCATGGAATAAAGCGGAGTACAG<br>B: ACAATTGATACGTCAAAATCCTCACC | 550                |
|                            | 2 or ½                    | F: GATTTGTCGGGAGGGTTACTTG<br>B: TAAATAATATGCCACTGTAGCGTCTC    | 450                |
|                            | 3                         | F: TGGGAGAAGGCAGAAAGTACGAGA<br>B: ACCCCCAGAAGAGCCGAAGGA       | 1,273              |
|                            | 7                         | F: GATGATTTATGGCACCCGAGTAAGC<br>B: AGTCACAATTGCTGGTCCTGACACC  | 150                |
|                            | 9                         | F: GGGATGATTGCTCGACAGAT<br>B: CCGAAGTATCTGGGCTACTG            | 300                |
|                            | 11                        | F: TACAGTGCTTGCAGCCCTAC<br>B: CGACTTGTCTGTCCTGAT              | 896                |
|                            | 16                        | F: TGGAGGAGCATCTACAGCTCGGAAT<br>B: TTTGTTTGTCTGGAATCTCAGGCACC | 202                |
| 2                          | 4                         | F: ACTTGGAGTTGTCGGAGTAGTGCT<br>B: ACCGCGATGGATAGGCCGAC        | 783                |
|                            | 5                         | F: TGATGGCGGAGTTTGGGTGCG<br>B: CGTAACAACCGCCCCAGCCG           | 166                |
|                            | 8                         | F: ATGGGCGTTGGCGGGAGTTT<br>B: TTACGGCCCCCATCACGCTG            | 320                |
|                            | 12                        | F: TGTGGCGATAGGACAACAGG<br>B: ACCAAGAAGTTTCCGCCTGA            | 209                |
|                            | 18                        | F: CGGGGCAGTCTTACTCATGG<br>B: ATGACAGCGAAACGGACAGA            | 432                |
|                            | 19                        | F: AGCAGGGTTGCGTATGGCGG<br>B: ACAAGCACCAGCAAAGACCGCA          | 1,024              |
|                            | 24                        | F: ACCCGGAAAAACCAGGAGTT<br>B: ACCAATCAATGCCAAGCGAC            | 500                |
|                            | 25                        | F: GGAGGAGCTGCGGGCTCATA<br>B: TGGCCACAACCTGGATGCGTT           | 1211               |
| 3                          | 6                         | F: TACGGTCTCCCTTGCTGTGA<br>B: AACTCAGCTAGTGCTCCACG            | 325                |
|                            | 10                        | F: TTACGAGGGGATTCTGGGGT<br>B: CGGGACAACAGATGGAACCT            | 153                |
|                            | 13                        | F: CTGGTGCTGCAATTCGCTT<br>B: GCAGACTAGCTGCAGTTCCA             | 1,135              |
|                            | 15                        | F: GCAAGAAAGCTTCCGGATGGA<br>B: CAAGAGAGTGTGCAACCCCA           | 274                |
|                            | 17                        | F: ACTTGGGTTGGAATGGCGAA<br>B: ACCACCGAAAGTCAGGTCAC            | 906                |
|                            | 23                        | F: TGCTCAACAAACGCAGCAAA<br>B: TGA CTGGTACATCTGCAGCC           | 454                |
|                            | 31                        | F: GGAGTGCTCTATGCCACCTT<br>B: GCATTGCCCTACAGCAAAC             | 550                |
| 4                          | 21                        | F: GGTGGCAAGGAGAGCAAAGT<br>B: ACATGGTAAGCCATTGCTGGA           | 325                |
|                            | 27                        | F: CTACGCCAATCGAAGCCAGA<br>B: CCAGTAAGAAGCCTGTCGCA            | 506                |
|                            | 28                        | F: GGACTTCGGTACCTTAGCGT<br>B: CTCCAGCACATTCCCGTACC            | 865                |
|                            | 29                        | F: GTGCGGGCGTTATTTTGGT<br>B: AGCCTTGCAACCCATTTCCT             | 435                |
